# Detecting patterns of accessory genome coevolution in bacterial species using data from thousands of bacterial genomes

Rohan S Mehta<sup>1,\*</sup>, Robert A Petit III<sup>2,3</sup>, Timothy D Read<sup>2,4</sup>, and Daniel B Weissman<sup>1</sup>

<sup>1</sup>Department of Physics, Emory University, Atlanta, GA, USA

<sup>2</sup>Division of Infectious Diseases, Department of Medicine, School of Medicine, Emory University, Atlanta, Georgia, USA

<sup>3</sup>Wyoming Public Health Laboratory, Cheyenne, WY, USA

<sup>4</sup>Department of Human Genetics, School of Medicine, Emory University, Atlanta, Georgia, USA

\*Corresponding author: [rsmeht4@emory.edu](mailto:rsmeht4@emory.edu)

March 15, 2022

## Abstract

Bacterial genomes exhibit widespread horizontal gene transfer, resulting in highly variable genome content that complicates the inference of genetic interactions. In this study, we develop a method for detecting coevolving genes from large datasets of bacterial genomes that we call a “coevolution score”. The method is based on pairwise comparisons of closely related individuals, analogous to a pedigree study in eukaryotic populations. This approach avoids the need for an accurate phylogenetic tree and allows very large datasets to be analyzed for signatures of recent coevolution. We apply our method to all of the more than 3 million pairs of genes from the entire annotated *Staphylococcus aureus* accessory genome of 2,756 annotated genes using a database of over 40,000 whole genomes. We find many pairs of genes that appear to be gained or lost in a coordinated manner, as well as pairs where the gain of one gene is associated with the loss of the other. These pairs form networks of dozens of rapidly coevolving genes, primarily consisting of genes involved in metal resistance, virulence, mechanisms of horizontal gene transfer, and antibiotic resistance, particularly the SCC*mec* complex. Our results reflect the fact that the evolution of many bacterial pathogens since the middle of the twentieth century has largely been driven by antibiotic resistance gene gain, and in the case of *S. aureus* the SCC*mec* complex is the most prominent of these elements driving the evolution of resistance. The frequent coincidence of these gene gain or loss events suggests that *S. aureus* switch between antibiotic-resistant niches and antibiotic-susceptible ones. While we focus on gene gain and loss, our method can also detect genes which tend to acquire substitutions in tandem or, in datasets that include phenotypic information, genotype-phenotype or phenotype-phenotype coevolution.

## Introduction

Interactions between genes are a major part of evolution, but they are fundamentally difficult to study due to the combinatorial explosion of the number of possible interactions [Phillips, 2008, Mackay, 2014]. In bacteria, widespread horizontal gene transfer creates a much wider range of potential genetic backgrounds and genetic interactions [Arnold et al., 2018]. Detecting gene-gene interactions without performing large numbers of assays requires the development of computational techniques that can handle the necessary volume of genomic data to find signatures in natural genetic diversity.

Methods for finding interactions at the level of genes generally perform Genome-Wide Association Studies (or GWAS) to detect relationships between genes and phenotypes. This approach has been widely used in

40 human populations, and while there have been successes (the first of which was Klein et al. [2005]; see Welter  
41 et al. [2014]), GWAS inference in humans is often complicated by the existence of population structure—  
42 systematic differences in allele frequencies among subgroups in a population [e.g. Pritchard and Donnelly,  
43 2001, Barton et al., 2019]. This is even more of a problem in bacterial populations, which often have  
44 stronger population structure due to their limited and biased recombination [Read and Massey, 2014, Chen  
45 and Shapiro, 2015, Power et al., 2017].

46 There are several existing approaches to detect genotype-phenotype associations in bacteria, the earliest  
47 of which are reviewed in Read and Massey [2014]. The software PLINK [Purcell et al., 2007], which is  
48 frequently used in human GWAS studies, has also been applied to bacterial datasets [Chewapreecha et al.,  
49 2014, Laabei et al., 2014, Power et al., 2016]. Approaches developed specifically for bacteria include those  
50 based on regression [Lees et al., 2016, Earle et al., 2016, Lees et al., 2018, Saber and Shapiro, 2020] and those  
51 based on phylogenetic convergence [Chen and Shapiro, 2015]. Techniques that explicitly take phylogenetic  
52 information into account fare better in highly clonal bacterial systems [Earle et al., 2016, Saber and Shapiro,  
53 2020].

54 Methods that use phylogenetic convergence are based on homoplastic events on a phylogeny. The package  
55 **hogwash** [Saund and Snitkin, 2020] implements two methods based on ancestral state reconstruction: **phyC**  
56 (introduced by Farhat et al. [2013]) and a more stringent method that was introduced by Hall [2014]. The  
57 package **treeWAS** [Collins and Didelot, 2018] pairs ancestral state reconstruction with simulation given a  
58 homoplasy distribution to compute three different tests of association: one that is only uses leaf data and  
59 is equivalent to the method proposed by Sheppard et al. [2013], one that is equivalent to **phyC** [Farhat  
60 et al., 2013], and one that is novel and takes into account co-occurrence times along the tree. Finally, **Scoary**  
61 [Brynilsrud et al., 2016], uses the method of pairwise comparisons [Maddison, 2000] to find the minimum  
62 number of necessary independent co-emergences of two genes given a phylogeny and evaluates association  
63 based on this number. These methods are generally computationally demanding, and indeed were left out  
64 of a recent simulation study comparing various bacterial GWAS techniques precisely for this reason [Saber  
65 and Shapiro, 2020].

66 While in principle all current published GWAS-style methods could be used to broadly detect gene-  
67 gene interactions (by treating the presence or absence of a gene as a “phenotype”), they are in general  
68 not built for comparing multiple sets of genes against each other simultaneously and running them for  
69 pairwise comparisons of large numbers of genes becomes prohibitively slow. (For instance, it would take  
70 **treeWAS** about 1,200 hours to run on a dataset of the size we consider if split the gene pairs into 5 batches.)  
71 Another approach is to specifically design methods for detecting interactions between genes via co-occurrence.  
72 **Pantagruel** [Lassalle et al., 2019] estimates gene trees and evaluates the co-incidence of events on gene trees  
73 under a species tree. **CoPAP** [Cohen et al., 2012, 2013] simulates gain and loss events for pairs of genes  
74 along a phylogeny under various coevolutionary models. Liu et al. [2018] use a maximum likelihood method  
75 developed by Pagel [1994] to identify genes that have related gain and loss patterns. Most of these approaches  
76 use specified evolutionary models, which can become unwieldy over large datasets as tree size grows. The  
77 recent method **Coinfinder** [Whelan et al., 2020] avoids using a full phylogenetic simulation or likelihood  
78 analysis by computing the existing phylogenetic statistic of lineage independence  $D$  [Fritz and Purvis, 2010]  
79 along with a simple statistic of co-incidence to determine putative gene-gene interactions.

80 Here, we introduce a new method for finding associations between genes in bacterial populations, specif-  
81 ically tailored to accommodate datasets with greater than 1,000 samples, by sidestepping a full phylogenetic  
82 analysis entirely. This method, which we call **DeCoTUR** (Detecting Coevolving Traits Using Relatives), is  
83 based on the idea that the clearest signal of biological association is that closely related individuals will  
84 differ in their gene presence-absence states in the same way. In our approach, we first identify pairs of closely  
85 related individuals. We then find pairs of genes for which, when one gene is gained or lost between a pair of  
86 closely related individuals, the other gene is frequently gained or lost as well. We apply our method to the  
87 **Staphopia** database [Petit III and Read, 2018]—which contains over 40,000 publicly available *Staphylococcus*  
88 *aureus* genomes—to detect correlated gain and loss between pairs of accessory genes. The number of such co-  
89 incident gain/loss events determines a gene pair’s “coevolution score”. We test for interactions by comparing  
90 this coevolution score to what would be expected if the two genes were gained and lost independently. With  
91 this method, we find interactions between genes involved in a wide variety of functions, including antibiotic  
92 resistance, virulence, pathogenicity, phage interactions, mobile genetic elements, and others. The majority of  
93 these interactions are positive associations, i.e., pairs of genes that are gained and lost together, rather than

94 substituting for each other. The bias towards positive interactions as well as many of the specific interacting  
95 pairs are consistent across genetic backgrounds. We find many interactions between closely linked genes that  
96 are likely co-transferred, particularly among genes related to antibiotic resistance. We also find interactions  
97 between genes that are not closely linked, especially among genes related to virulence. The coevolution of  
98 these pairs is likely to involve multiple transfer events and be driven by epistasis or correlated selection across  
99 environments. Finally, we introduce the R package `decotur` that allows the computation of our coevolution  
100 score.

## 101 **Methods**

### 102 **Data**

103 We downloaded all public samples from the Staphopia database [Petit III and Read, 2018], for a total of  
104 42,949 samples. We used the core genome of shared genes determined by Petit III and Read [2018] to  
105 compute nucleotide divergences between the samples and we removed 10,308 samples that were identical in  
106 core genome sequence and accessory genome composition to at least one other sample. We used each sample’s  
107 multi-locus sequence type (MLST, provided by Staphopia) and the publicly-available pubMLST database  
108 (<https://pubmlst.org/saureus/>) to determine its clonal complex (CC). We then performed all subsequent  
109 gene-interaction analyses on each clonal complex separately to study the effect of different backgrounds  
110 on associations, as well as a combined analysis using a subset of samples from all clonal complexes (see  
111 Appendix I for details). We also computed coevolution scores among antibiotic resistance phenotypes across  
112 the whole database obtained from ARIBA predictions [Hunt et al., 2017] in Staphopia.

113 Of the 42,949 public samples in Staphopia, 612 had a sequence type of 0 and were unable to be mapped  
114 to a clonal complex. These sequences were added into a “Other” category, along with all sequences that  
115 had a known sequence type but no assigned clonal complex. See Figure S1 for sample sizes for each clonal  
116 complex.

### 117 **Finding close pairs of individuals**

118 We determined closely-related (i.e. “close”) pairs of samples based on the distribution of distances in a  
119 pairwise distance matrix—computed using Hamming distances on the concatenated core genome—of all  
120 considered samples. This procedure requires a choice of distance cutoff, with pairs of samples whose pairwise  
121 distance is below this cutoff are considered to be “close”. In principle, this cutoff can be tuned to whatever  
122 scale is of interest, or to match the number of close pairs to the available computational power. We chose  
123 cutoffs that resulted in (approximately) 5,000 close pairs for each clonal complex (Table S1) after a pre-  
124 liminary analysis that demonstrated that this number was within a range that yielded relatively consistent  
125 results across different cutoffs (Figure S5).

### 126 **Filtering genes**

127 For each analysis, we only include genes which have at least two of the less frequent state (presence or  
128 absence) in the set of samples used in close pairs. These are the only genes with sufficient presence-absence  
129 polymorphism to potentially show a signal of coevolution.

130 Additionally, previous work has found that the splitting up of gene families dilutes the signal of genetic  
131 association with antibiotic resistance phenotypes [Wheeler et al., 2019], and we attempted to mitigate this  
132 problem by considering gene “presence” to be the presence of at least one annotation with a particular gene  
133 name. For example, in CC1, the gene *mecA* is present in 730 samples out of 1995. In 729 out of those 730  
134 samples, it is present in a single copy, but one sample has two copies. For the purposes of this analysis, we  
135 treat those two copies as a single “presence” of *mecA* for that sample.

### 136 **Computing the coevolution score**

137 Here we will outline how we test for coevolution between a specific pair of genes, gene 1 and gene 2. To  
138 compute the coevolution score, we test each pair of closely related individuals  $i$  and  $j$  for evidence of

139 coevolution. Most pairs of close relatives will necessarily be uninformative: for each gene, they will either  
 140 both have the gene or both lack it, simply by virtue of being closely related. But for genes that are frequently  
 141 gained and lost, there will be some pairs of close relatives that differ in the focal genes, and these are the  
 142 pairs that can contribute to the score. Let  $P_{n,k}$  be an indicator variable for the presence of gene  $n$  in  
 143 individual  $k$ , e.g.,  $P_{1,i} = 1$  if individual  $i$  has gene 1 and 0 otherwise. If one individual has both genes and  
 144 the other individual has neither, i.e.,  $(P_{1,i}, P_{1,j}, P_{2,i}, P_{2,j}) = (1, 0, 1, 0)$  or  $(0, 1, 0, 1)$ , then we add +1 to the  
 145 score representing a positive association between the genes. Conversely, if one individual has only one gene  
 146 and the other individual has only the other, i.e.,  $(P_{1,i}, P_{1,j}, P_{2,i}, P_{2,j}) = (1, 0, 0, 1)$  or  $(0, 1, 1, 0)$ , then we add  
 147 +1 to the score representing a negative association between the genes. We compute two separate scores, one  
 148 for each of these two types of associations. Figure 1 provides an example situation which illustrates how the  
 149 score focuses on recent co-incident evolutionary events (represented by the red samples in Figure 1), while  
 150 omitting older evolutionary events.

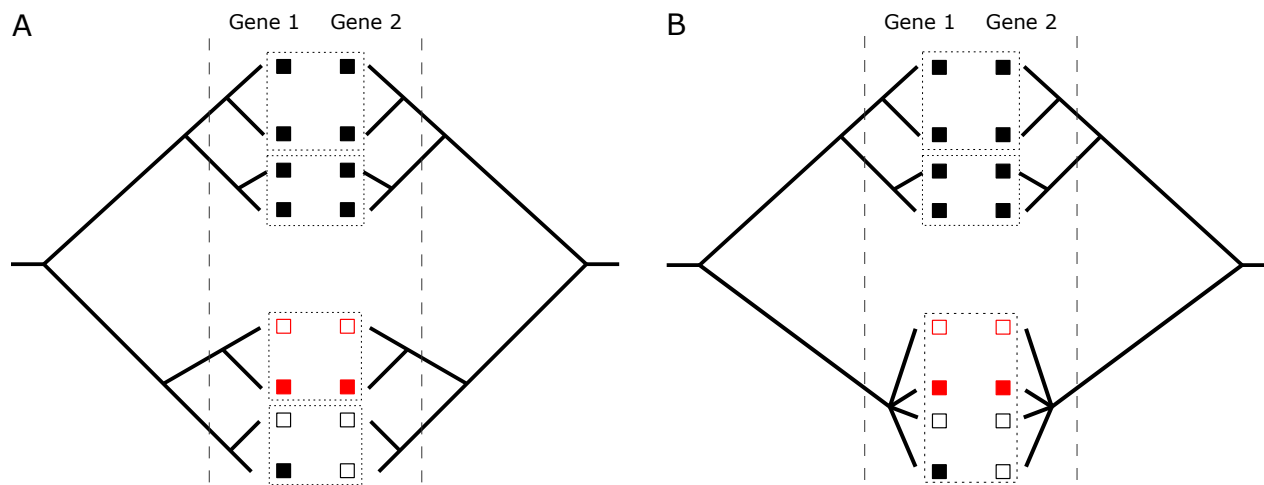

Figure 1: Two examples of the coevolution score computation for a pair of genes (left and right trees in each panel). (A) an example with all disjoint close pairs. (B) An example with an unresolved polytomy “bush,” in which all individuals present are close pairs with each other. The vertical dashed lines indicate the distance cutoffs used to determine close pairs. Filled squares indicate presence of a gene, empty squares indicate its absence. Dashed boxes indicate individuals that are in close pairs with each other. In both (A) and (B), there is exactly one close pair of individuals (in red) that is polymorphic for both genes, indicating recent gain/loss, so only that close pair contributes to the score. The genes differ in the same way (the top red individual has neither gene, the bottom red individual has both), so this contributes to the *positive* score for the gene pair. In (A), the single close pair contributes a value of 1 to the positive score. In (B), this close pair is part of a bush of  $\binom{4}{2} = 6$  close pairs, so it contributes only  $\frac{1}{6}$  to the positive score. The more ancient event that produced the difference between the top clade (where both genes are present in all individuals) and the bottom clade (where both genes are mostly absent) does not contribute to the score. Note that our method does not actually use the trees, only which pairs of individuals are closely related.

151 The phylogenies of clonal complexes in *S. aureus* often feature multiple clusters of extremely closely  
 152 related individuals that form “bushes” in which it is difficult to tell which samples are most closely related  
 153 (see Figure S4), and for which the specific tree structure may not be difficult to infer accurately. Rather  
 154 than trying to resolve these bushes, we adjust the value of the contribution for each close pair based on the  
 155 size of the bush it comes from. Specifically, we partition all the samples into groups where two samples are  
 156 in the same group if they form a close pair. If pair  $k$  is in a group with  $n_k$  total pairs, then we divide the  
 157 contribution of that pair to the score by  $n_k$ . In other words, the maximum total contribution of each bush  
 158 to the score is 1. This is a very conservative estimate of the amount of coevolution in bushes; it treats a  
 159 bush as if it were an unresolved polytomy and ignores any tree structure inside the bush that may otherwise  
 160 indicate a coevolutionary signal. In Figure 1B, there are three bushes, two of size 2 and one of size 4. Only  
 161 the size 4 bush contributes to the score, and the contribution to the score of that bush is  $1/6$ , as one of

162 the six close pairs in that bush (the red pair) contains a pattern that contributes to the score. Contrast  
163 this to the situation in Figure 1A, in which the only bush that contributes to the score is of size 2, so its  
164 contribution is 1.

165 Because our method is based on genetic diversity, it necessarily has the most power to detect coevolution  
166 among genes that are at intermediate frequencies. But because we focus on recent/ongoing evolution, the  
167 power to detect coevolution does not just depend only on the frequency of a gene in the sample, but also  
168 on its distribution. For genes that are essentially exclusively clonally inherited and whose polymorphism  
169 corresponds to a deep split in the phylogeny, we do not expect to find a signal, while we have the most power  
170 to detect coevolution among genes that are frequently lost or gained via horizontal gene transfer and widely  
171 distributed among clades.

172 Genes that are frequently gained and lost can purely by chance generate a nonzero score. To test for this,  
173 we found the total number of discordances between close pairs for each gene. We then used Fisher's Exact  
174 Test to determine if polarized discordances (i.e. discordances that contribute to the positive or negative  
175 score) are enriched in any given pair of genes. Pairs of genes that meet a Bonferroni-corrected significance  
176 cutoff in this test were kept as statistically significant. Around 33% of our nonzero scores for each clonal  
177 complex (166,443 out of 497,772) had a Bonferroni-corrected  $p$ -value  $< 0.05$ . See Appendix C for details.  
178 This approach is somewhat liberal, as for a given distance cutoff, some close pairs of individuals will have  
179 a genetic distance close to the cutoff and therefore be more likely just by chance to differ at both genes  
180 than pairs of individuals that are much closer. In practice, however, we use very tight distance cutoffs  
181 so that there is limited variation in genetic distances among close pairs, and we expect this effect to be  
182 minor. In datasets with more variation in genetic distance among close pairs, one could use a slightly more  
183 sophisticated approach by calculating the rates of gene gain and loss relative to the core mutation rate and  
184 use that to determine statistical significance.

185 To construct interaction networks such as those in Figures 2 and 6, we chose a coevolution score threshold;  
186 if two genes have a score above this threshold, we drew a link between them with the weight being the score.  
187 These score thresholds were chosen primarily for visualization purposes, but they were always chosen from  
188 the extreme high end of the score distribution.

## 189 Detecting positive bias

190 In the absence of bushes, we have equal power to detect both polarities. But the presence of bushes leads to  
191 a bias towards inferring positive interactions (see Appendix E). This bias generally only affects gene pairs  
192 with significant contributions from both positive and negative interactions, but to measure the overall distri-  
193 bution of positive and negative interactions—including small ones—we eliminated the bushes by randomly  
194 subsampling a single close pair from each bush and computing the score using only those close pairs, and  
195 then repeated this process 100 times to achieve 100 independent replicates for the same gene pair. A positive  
196 interaction has more positive scores than negative scores across these replicates; a negative interaction has  
197 fewer. We then used the resulting distribution of positive and negative interactions to infer the probability  
198 of positive polarity in Figure 4 (see Appendix E for details).

## 199 Results

### 200 Gene-gene interactions range from individual operons to complex webs

201 Throughout all clonal complexes, we consistently find some of the strongest signals of coevolution among  
202 genes related to resistance to antibiotics and metals; mobile genetic elements; and genes that influence  
203 virulence and toxicity, by e.g. producing a toxin, being involved in biofilm formation, or regulation. But  
204 the coevolution networks also include many genes whose functions do not obviously pertain to any of the  
205 aforementioned functions. Figure 2 provides an example of such an interaction network obtained from a full-  
206 dataset analysis, using only interactions in approximately the top 0.01% of scores that passed the significance  
207 test outlined in Appendix E. The procedure for obtaining this full-dataset analysis is outlined in Appendix I.

208 There are five notable large clusters of interactions in Figure 2. The largest contains all of the major  
209 genes contained in the *SCCmec* cassette, a non-*SCCmec* operon that also confers beta-lactam resistance  
210 (*blaZ* and *blaR1*), a cadmium resistance operon (*cadD* and *cadX*)—reflecting a known plasmid interaction

211 [McCarthy and Lindsay, 2012]—and genes that are involved in plasmid replication (*pre*, *rep*, and *repA*). The  
 212 next largest is a collection of virulence genes, including toxin-producing genes (*lukE*, *lukD*, *essD*, *esxB*, *esaC*,  
 213 and *esxB*), endopeptidases that are regulated by *arg* (*splB/C/E*), and capsule genes (*cap8H/I/J/K*). There  
 214 are two other virulence-based clusters, one of which has a negative interaction with *norB*, which confers  
 215 quinolone resistance. The other virulence-based cluster also contains genes involved in DNA metabolism  
 216 (*recT*, *rusA*, and *ssb2*). Finally, the large major cluster contains virulence genes, antibiotic resistance genes,  
 217 and bacteriocin genes (specifically, the lantibiotic nisin). There are also six smaller clusters of genes of  
 218 varying function. These interactions paint a picture of recent genetic coevolution in *S. aureus* that focuses  
 219 on host-pathogen interaction in all of its many facets.

220 We also note that a handful of interactions seen in Figure 2 are artifacts of annotation. In particular,  
 221 *spoU* and *trmH* are two names for the same gene. In addition, *opp3C* and *opp3F* refer to specific alleles of  
 222 *oppC* and *oppF*. The “negative” interactions between *spoU* and *spoU/trmH*, *opp3C* and *oppC*, and *opp3F*  
 223 and *oppF* are all due to the fact that some studies use one name and some studies use another. This  
 224 inconsistency is a challenge for any large-scale analysis of genomic content; fortunately it is frequently easy  
 225 to spot in results like these.

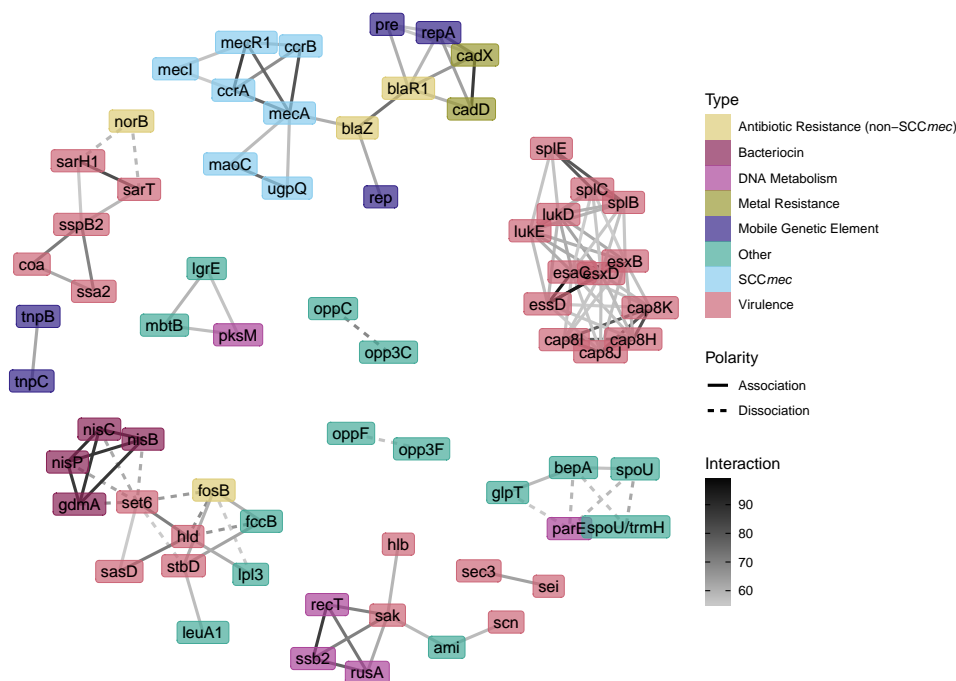

Figure 2: Gene-gene coevolution network for the top 65 significant gene pairs in the full dataset, with nodes colored by gene function, edge color indicating the strength of the inferred interaction, and edge type indicating the polarity of the interaction. A small handful of kinds of genes that are all frequently horizontally transferred—primarily relating to resistance, virulence, or gene transfer itself—tend to dominate the interaction network.

## 226 Coevolution score differs substantially from correlation

227 An easy-to-compute first pass at attempting to detect genetic interactions is to compute the correlations  
 228 between presence-absence vectors for pairs of genes, without performing any phylogenetic correction. Figure 3

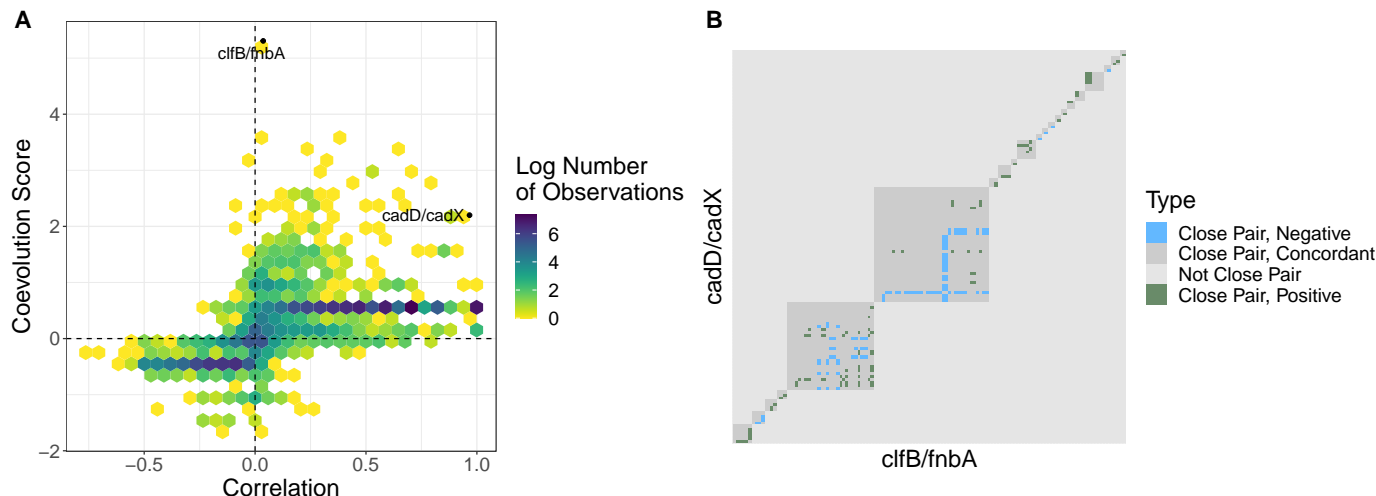

Figure 3: (A) Coevolution scores vs. correlation for CC15. The sign of the score indicates its polarity. The color of a hexagonal bin represents the log of the number of data points in that bin. The coevolution score highlights only a small fraction of the highly correlated pairs of genes, as well as some pairs that do not have a high overall correlation. (B) Interactions between a pair of genes come from multiple sample groups, and different interactions between pairs of genes come from different sample groups. Each x-y coordinate of this heatmap is a sample pair in CC15. The color of each coordinate corresponds to whether that pair contributes to a positive association, a negative association, or not at all (either because it is not a close pair or because it is a close pair but there is no discordance in gene presence/absence). The top part of the matrix corresponds to the *cadD/cadX* gene pair, and the bottom part corresponds to the *clfB/fnbA* gene pair (labeled in (A)). For both gene pairs, multiple separate groups of closely related individuals contribute to the coevolution score. Different pairs of individuals contribute to the coevolution scores of the two gene pairs.

229 compares our coevolution score with this correlation for each pair of genes for samples in CC15, and Figure S3  
 230 shows this comparison for each clonal complex.

231 Overall, there is an association between the two measures, as is to be expected: all gene presence-absence  
 232 configurations that contribute to the coevolution score also contribute to correlation. But the converse is not  
 233 true, and indeed, most highly correlated pairs of genes have modest coevolution scores; in other words, most  
 234 correlation appears to be phylogenetic. Thus, coevolution score can be used to filter out the vast numbers  
 235 of highly correlated gene pairs to focus on the few currently or recently coevolving ones. There are few gene  
 236 pairs that have high coevolution score but low correlation. This is because the coevolution score is driven  
 237 by exceptional events (double gene gains or losses between extremely closely related individuals). Even a  
 238 handful of such events can provide a clear signature of coevolution, while being too rare to produce a strong  
 239 correlation. The fact that these high-score, low-correlation pairs of genes are rare suggests that ancient,  
 240 long-term evolution is concordant with recent, short-term evolution.

241 Two high scores in CC15 in Figure 3A are between *cadD-cadX*, two genes involved in cadmium resistance  
 242 that are found on *SCCmec*, and between *clfB-fnbA*, two genes that are involved in cell surface adherence and  
 243 host colonization. We chose these two pairs to compare because they represent a high-score, high-correlation  
 244 pair (*cadD/cadX*) and a high-score, low-correlation pair (*clfB/fnbA*). Figure 3B shows all samples that  
 245 contributed to the scores for each of these pairs. The samples in CC15 are the rows and columns of the  
 246 matrix, and each square represents a pair of samples. Close pairs of samples are shown in the darker gray  
 247 squares and are colored by their contribution to the score. For each of these two pairs of genes, contributions  
 248 come from multiple different groups of close pairs, and these groups contribute different amounts for the  
 249 different interactions.

## 250 Most associations between genes are positive

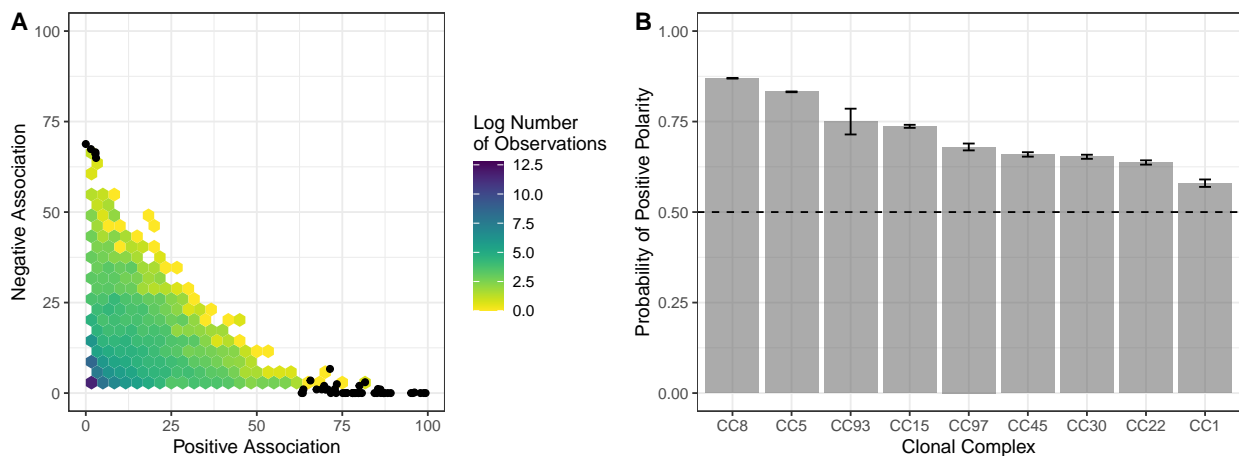

Figure 4: The majority of interactions between coevolving genes are positive. (A) Distribution of positive and negative associations for each pair of genes in the full dataset analysis. Black dots are the top 50 scores. (B) Bars show the estimated probability that the interaction between a pair of genes that are strongly coevolving in the listed clonal complex is positive, i.e., that gain (loss) of one of the genes in the pair is positively associated with gain (loss) of the other gene (see Methods and Appendix E for details). Error bars are the standard error of the probability estimate.

251 Our method can detect both positive coevolution (e.g., where the gain of one gene is associated with  
252 the gain of the other) and negative coevolution (e.g., where the gain of one gene is associated with the  
253 *loss* of the other). Because we measure both positive and negative interactions for the same pairs of genes  
254 separately, we can identify pairs of genes that have strong positive interactions in some parts of the tree  
255 and strong negative interactions in other parts of the tree. In general, we would expect this effect to occur  
256 more frequently for larger sampling scales (i.e. multiple clonal complexes or a large clonal complex) and less  
257 frequently for smaller sampling scales (a single, small clonal complex). Figure 4A shows that in a full-dataset  
258 analysis, while the strongest interactions are primarily confined to mostly-positive or mostly-negative, there  
259 are some interactions of notable magnitude with contributions from both. Figure 4B displays the probability  
260 that an interaction is positive for each clonal complex, correcting for bush-induced positive bias (see Methods  
261 and Appendix E). We find that positive interactions are significantly more likely than negative interactions  
262 in all clonal complexes (Figure 4).

## 263 Strong interactions are consistent across backgrounds

264 Each clonal complex reflects a different “path” of evolution for *S. aureus*, potentially facing different envi-  
265 ronments and different selective pressures. To determine whether the same interactions consistently appear  
266 across the clonal complexes, we tabulated the number of times each interaction appeared in the top 5% of  
267 scores for each clonal complex. We then compared the distribution of the number of clonal complexes for  
268 which each interaction appeared in the top 5% to a null distribution where the top 5% was chosen randomly  
269 from the set of interactions for each clonal complex independently. This null distribution is a binomial  
270 distribution with probability 5% conditional on one success.

271 Figure 5 plots these two distributions. The observed distribution has many more interactions that are  
272 strong in  $> 5$  clonal complexes (and fewer that are strong in  $< 5$ ) than would be expected if the interactions  
273 were independent across clonal complexes. Thus, strong interactions are more likely to be strong across  
274 clonal complexes, and so these interactions are consistent across clonal complexes.

275 Figure 6 displays the 28 significant interactions that are in the top 5% of scores in at least 7 clonal  
276 complexes. These interactions can be divided into 8 disjoint groups: the *SCCmec* cassette, one biofilm-  
277 related virulence group, two toxin-related virulence groups, one bacteriocin group, one antiseptic resistance



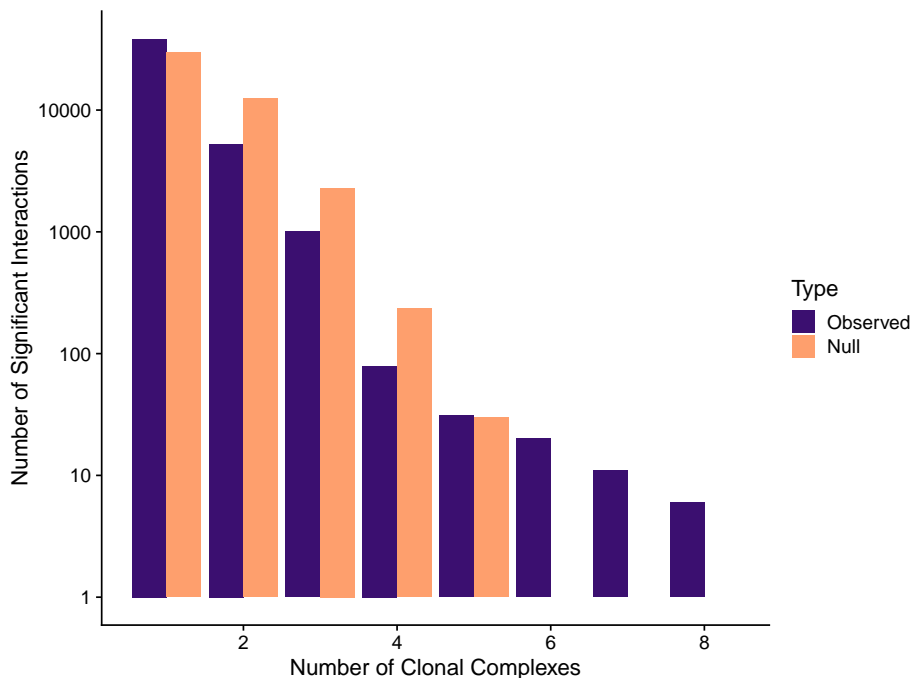

Figure 5: There are a substantial number of significant interactions that appear in the majority clonal complexes at the 95th percentile or higher. This figure plots, per interaction, how many clonal complexes that interaction is above the 95th percentile in score for that clonal complex against a null distribution that is binomial with success rate 5%.

278 group, one beta-lactam and cadmium resistance group, and one group with genes that are involved in various  
279 DNA activities (replication, recombination, restriction).

## 280 Antibiotic resistance phenotypes fall into two sets of interactions

281 Our coevolution score is not restricted to gene presence/absence and can be applied to any binary trait. We  
282 initially applied the score to SNPs, but found that accessory genes had more interesting evolutionary patterns  
283 in this dataset. We can also apply our method to binary phenotypes, such as the presence or absence of  
284 antibiotic resistance. Staphopia predicts antibiotic resistance phenotypes using ARIBA [Hunt et al., 2017].  
285 For each sample in the full-dataset analysis, we computed coevolution scores for these predicted antibiotic  
286 resistance phenotypes. Figure 7 displays a heatmap of the significant interactions and significant pairwise  
287 correlations for these phenotypes. Note the the coevolution scores as scaled so that the highest magnitude  
288 is one and the lowest magnitude is zero.

289 There is a strong positive interaction cluster between both beta-lactam resistance phenotypes, MLS,  
290 aminoglycoside, trimethoprim, tetracycline, and phenicol resistance. The two strongest interactions are be-  
291 tween aminoglycoside and MLS resistance and between *SCCmec* and non-*SCCmec* beta-lactam resistance.  
292 Fosfomycin resistance appears to strongly negatively interact with the other resistances. Finally, the remain-  
293 ing resistance phenotypes form a peripheral, weakly interacting group. These phenotypes are also in general  
294 much rarer than those in the beta-lactam interaction group, so their signal is limited.

295 The high-scoring group also has high correlation, but fosfomycin resistance has a clear negative signal  
296 with the coevolution score and no clear signal with correlation. Five of the peripheral resistance phenotypes  
297 are strongly correlated with each other, but have very little signal with the coevolution score.

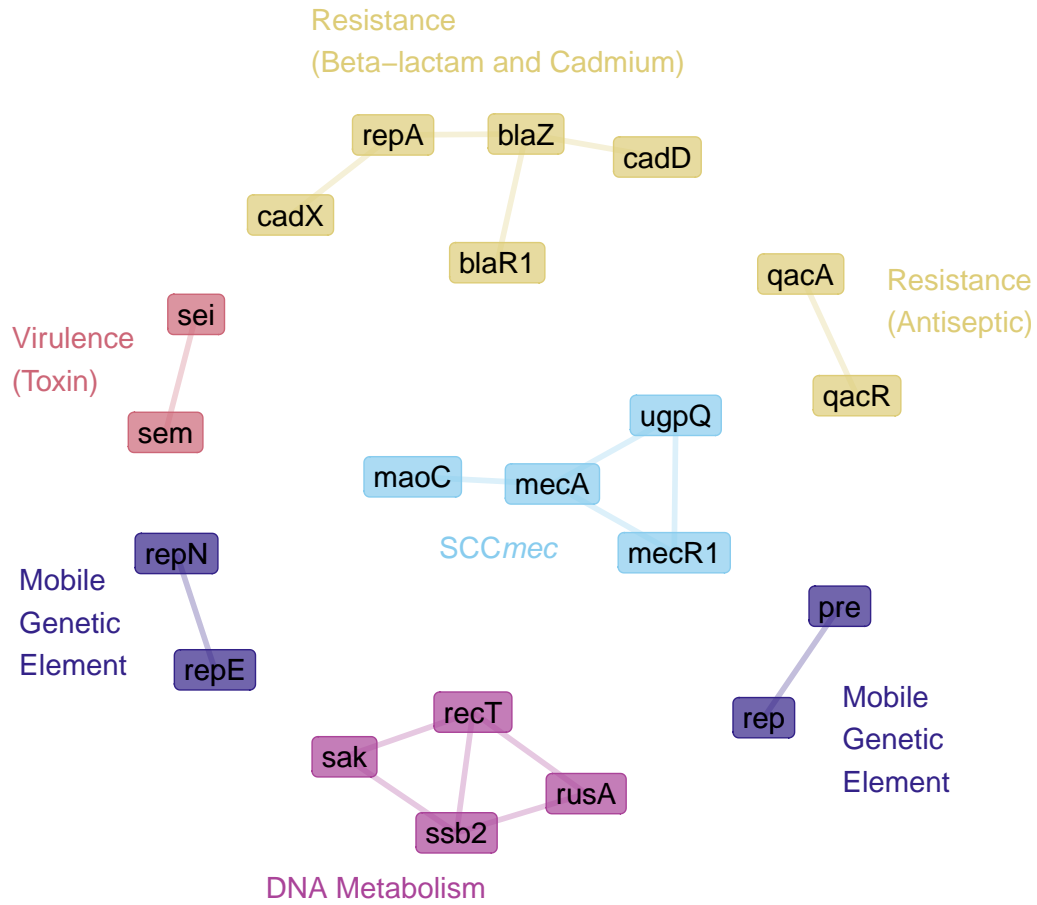

Figure 6: All significant interactions that occur in the top 5% for at least 7 clonal complexes. The groups are labeled and colored by the type of gene they contain. Each interaction in the network has positive polarity; no negative interaction was in the top 5% for more than 3 clonal complexes.

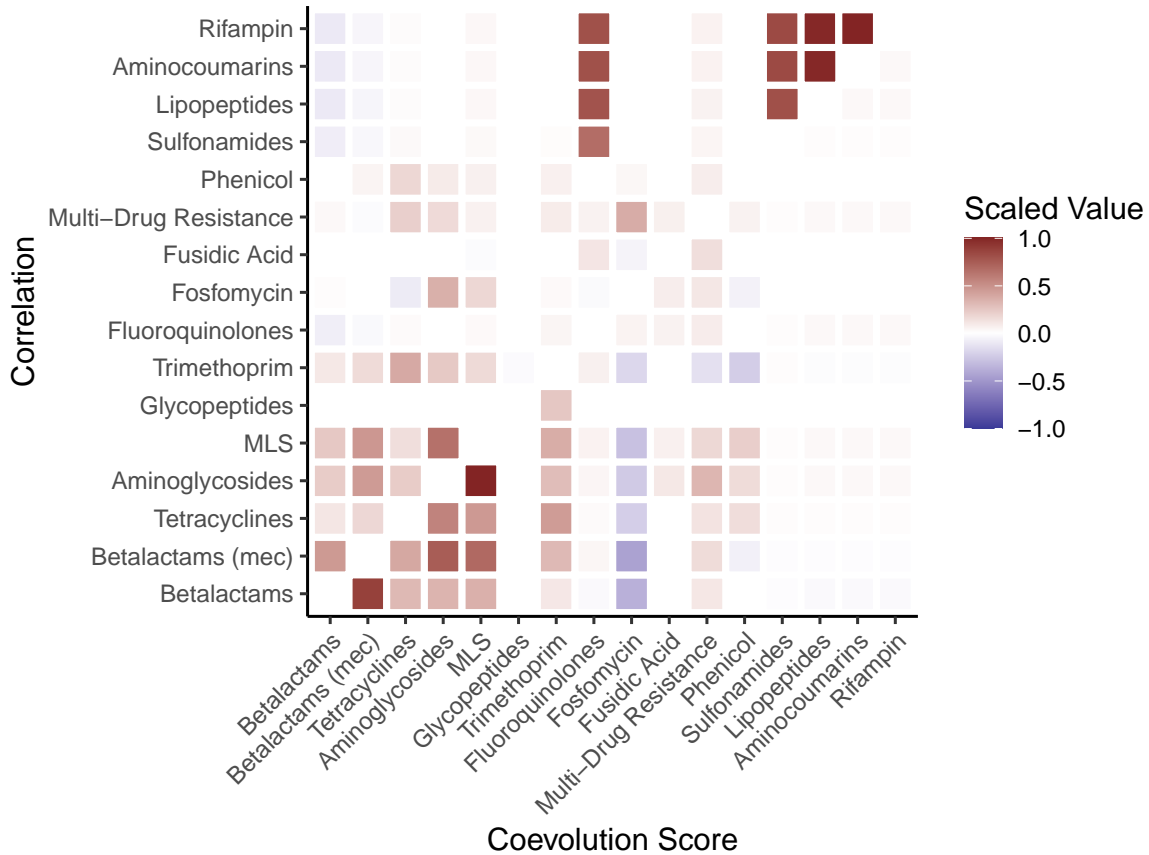

Figure 7: Significant coevolution scores (bottom-right triangle) and pairwise correlation values (top-left triangle) for predicted antibiotic resistance phenotypes in *Staphylococcus aureus*. The strongest interaction block involves resistance to MLS, aminoglycosides, betalactams, and tetracyclines. Multi-drug resistance, and resistance to fusidic acid, glycopeptides, trimethoprim, fluoroquinolones, rifampin, lipopeptides, and sulfonamides have peripheral interactions. The axes are ordered according to a hierarchical clustering on the coevolution score.

## 298 Comparison with Coinfinder

299 To compare our method with that of Coinfinder, we ran Coinfinder on CC97. Figure 8 compares an interac-  
300 tion network produced by Coinfinder with one produced by our method for this clonal complex. One major  
301 distinction between our method and that of Coinfinder is that we use the genetic distance cutoff as a way  
302 to avoid having to deal with the phylogeny, whereas Coinfinder handles phylogeny-induced correlations by  
303 presenting Fritz and Purvis [2010]’s D statistic as metadata for their interaction network. However, the phy-  
304 logenetic statistic D used by Coinfinder uses some of the same ideas that we use in motivating our score: in  
305 particular, situations that maximize D (i.e. all sister taxa differ in gene presence/absence) are necessary but  
306 not sufficient for maximizing our score (which also takes coincident difference between genes into account).  
307 Our use of the distance cutoff eliminates the major computationally difficult step of Coinfinder—computing  
308 D for each gene using the whole tree—at the cost of only looking at recent events.

309 Figure 8 compares an interaction network obtained using our method with Coinfinder’s default method.  
310 We used a score cutoff of the 97.3rd percentile to obtain 83 interacting genes, which is close to the 84  
311 interacting genes obtained by Coinfinder. While there are significant overlaps, implying that some signals  
312 are detected by both methods, there are also substantial differences in the results of the two methods. In  
313 particular, both methods detect many of the same genes as interacting, but the underlying network structure  
314 is very different and communities are not preserved across methods. This lack of coherent community  
315 structure in Coinfinder may be due to the fact that there is no sense of interaction “weight” (only a p-value),  
316 and so Coinfinder reports many more interactions that are potentially weak, which would obscure community  
317 structure in the interaction network.

## 318 Discussion

319 We have presented a new method for detecting interactions between genes in large bacterial datasets, using  
320 pairwise divergence in the core genome to find closely-related pairs of organisms and finding pairs of genes  
321 that differ within the same close pairs. We applied this method to Staphopia, a dataset of more than 42,000  
322 genomes of *Staphylococcus aureus*, to find a network of accessory genes that are being gained and lost  
323 together.

324 The gene interactions that our method detects present an interconnected picture of various ways in  
325 which *S. aureus* interacts with its environment. Along with antibiotic resistance genes, we found substantial  
326 interaction with genes that promote virulence and pathogenicity—ranging from host colonization to toxin  
327 production—as well as genes that code for resistance to metals and genes that are involved in plasmid  
328 replication, bacteriocins, and DNA metabolism. Our results suggest that recent gene-gene coevolution in  
329 *S. aureus* is a complex, interconnected web in which horizontal gene transfer allows lineages to rapidly acquire  
330 a suite of traits involved in pathogenicity, including antibiotic resistance, host colonization, and competition  
331 with other bacteria.

332 The gene interactions we detected were frequently, but not universally, conserved across different clonal  
333 complexes. The different environments that different clonal complexes have recently encountered may lead  
334 to differences in the effects of various genes on other genes through different selection pressures and different  
335 pleiotropic effects. Also, differences in horizontal gene transfer between clonal complexes may have led to  
336 different opportunities for interaction. Studying the differences in clonal complexes with respect to genetic  
337 interactions and horizontal gene transfer may reveal important information about recent *S. aureus* evolution.

338 We found that most interactions between pairs of genes are positive, with the presence of one gene  
339 correlated with the presence of the other, rather than anti-correlated. This is similar to the result found  
340 by Hall et al. [2021] using a different method (Coinfinder) in a different system (*E. coli*), suggesting that it  
341 may be a general pattern. Both of these results support the idea that HGT-based evolution is driven more  
342 by the collection of genes that work well together as opposed to the sorting of a diverse set of genes that  
343 are interchangeable. Of course, selection may favor linking such sets of genes into operons, which will then  
344 facilitate their co-transfer and strengthen the pattern of positive associations.

345 One of the more unexpected results we found was cadmium resistance’s frequent strong coevolution  
346 with antibiotic resistance. It is not obvious why these genes should have such a strong signal across clonal  
347 complexes, especially considering that there are other genes that are also frequently found in *SCCmec* that

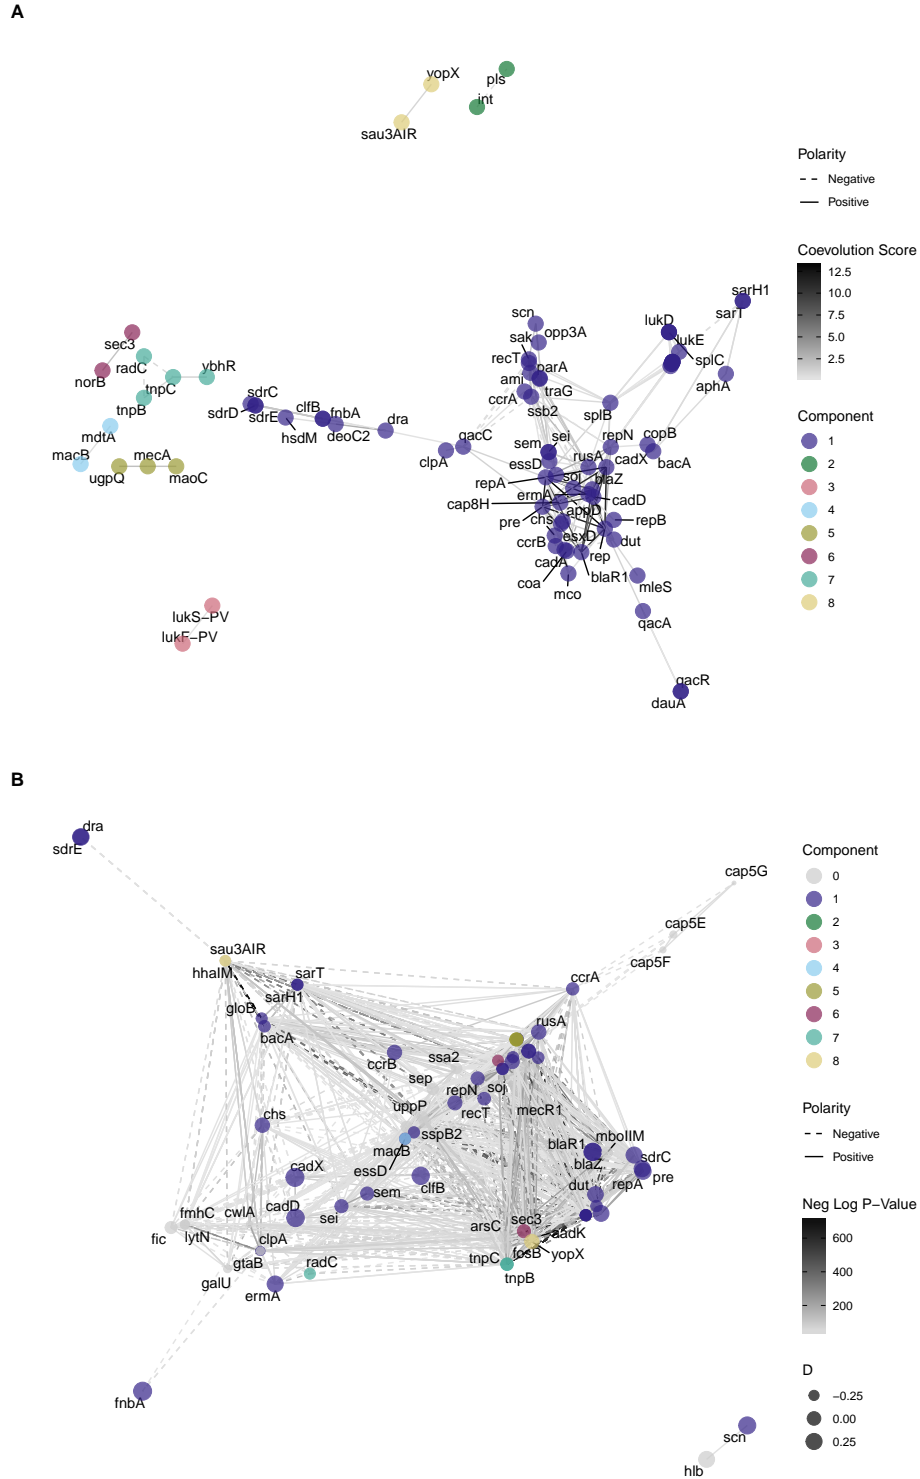

Figure 8: Our results show some overlap but some differences with those of Coinfinder when run on the same clonal complex (CC1). (A) Significant coevolution score network, with score cutoff at the 97.3rd percentile. (B) Coinfinder network, with the p-value of the interaction as a proxy for interaction strength, and the phylogenetic signal score D reported as node size (largest is more phylogenetically independent). Node color corresponds to component in the coevolution-score network (A). Nodes in (B) that are not in (A) are labeled as component 0.

348 show much weaker interaction. One potential explanation could involve a linkage of cadmium resistance to  
349 survival in wastewater as a transmission mechanism [Amirsoleimani et al., 2021, e.g.].

350 One major question about the mechanism of genetic interaction that is generally difficult to achieve  
351 without extremely thorough genome assembly annotation is the distinction between interactions between  
352 linked genes—which would imply a single gain/loss event—versus interactions due to unlinked genes, which  
353 would imply multiple gain/loss events. Outside of analyzing known operons, this distinction is impossible to  
354 properly interrogate in most cases without comparing the specific alignment of each genome simultaneously,  
355 which is intractable for large datasets. For unlinked genes, a major question is if there is a consistent order  
356 in which the gain/loss events occur within a pair of interacting genes. For instance, among genes that  
357 interact with antibiotic resistance genes, we would expect potentiating genes or mutations to tend to be  
358 acquired before the resistance gene, and compensatory genes or mutations to be acquired after. While we  
359 cannot address this question with our pair-based approach, it may be possible to extend it by using local  
360 phylogenies to infer the order of gains and losses.

361 The Staphopia database is compiled from public data; sampling biases in these data will therefore be  
362 preserved in Staphopia. One major such bias is the overabundance of MRSA (methicillin-resistant) vs.  
363 MSSA (methicillin-sensitive) strains due to the important clinical relevance of certain MRSA strains. This  
364 bias could potentially inflate the importance of the *SCC<sub>mec</sub>* cassette. Two aspects of our method can  
365 mitigate this bias. First, by downweighting bushes by their size, we avoid the score being dominated by  
366 a recent well-sampled branch of the tree. Second, by splitting up some of our analyses by clonal complex  
367 and then tracking interactions that occur consistently across clonal complexes, we mitigate effects of uneven  
368 sampling in clonal complexes. The only true solution to this bias, however, would be to design studies that  
369 deeply sampled genomes in a way that somehow reflected the underlying population structure of *S. aureus*  
370 and reduced biases away from strains with particular antibiotic resistance and virulence characteristics. The  
371 problem with this solution is that we do not know the actual underlying population structure, so perhaps  
372 more scattershot metagenomic sampling will provide an alternative set of differently-biased samples for  
373 comparison.

374 A major limitation of compiling and analyzing genomic data from multiple sources is inconsistencies  
375 with gene annotation. Potentially incomplete, ambiguous, or mismatched annotation reduces the power of  
376 methods like the one presented here to detect interactions, and we see that it can also produce spurious  
377 interactions. However, it is worth noting that one of the advantages of a database like Staphopia in the first  
378 place is more consistent annotation, with genomes annotated at the same time using the same software or  
379 database. In this work, we limited ourselves to only those genes that were annotated in Staphopia by way of  
380 being assigned a “name” in the standard sense (like “*mecA*”). This technique is effective at quickly obtaining  
381 broad-scale results, but analyses on a finer scale would require additional steps to mitigate this limitation.

382 The ability to discover and investigate interactions between genes in bacteria will only increase with the  
383 increase in the accessibility of large amounts of data provided by databases such as Staphopia. With more  
384 data, we may be able to discover more interactions with smaller signals, or interactions that are strong but  
385 rare. We constructed our method specifically to be able to keep up with this progress. Methods such as  
386 ours, coupled with databases such as Staphopia, will allow both the study of broad-scale patterns of bacterial  
387 evolution as well as providing more focused results for future study.

## 388 References

- 389 Atena Amirsoleimani, Gail Brion, and Patrice Francois. Co-carriage of metal and antibiotic resistance genes  
390 in sewage associated staphylococci. *Genes*, 12(10):1473, 2021.
- 391 Brian J Arnold, Michael U Gutmann, Yonatan H Grad, Samuel K Sheppard, Jukka Corander, Marc Lipsitch,  
392 and William P Hanage. Weak epistasis may drive adaptation in recombining bacteria. *Genetics*, 208(3):  
393 1247–1260, 2018.
- 394 Nick Barton, Joachim Hermisson, and Magnus Nordborg. Population genetics: Why structure matters.  
395 *eLife*, 8:e45380, 2019.
- 396 Ola Brynildsrud, Jon Bohlin, Lonneke Scheffer, and Vegard Eldholm. Rapid scoring of genes in microbial  
397 pan-genome-wide association studies with Scoary. *Genome Biol*, 17(1):238, 2016.

- 398 Peter E Chen and B Jesse Shapiro. The advent of genome-wide association studies for bacteria. *Curr Opin*  
399 *Microbiol*, 25:17–24, 2015.
- 400 Claire Chewapreecha, Pekka Marttinen, Nicholas J Croucher, Susannah J Salter, Simon R Harris, Alison E  
401 Mather, William P Hanage, David Goldblatt, Francois H Nosten, Claudia Turner, et al. Comprehensive  
402 identification of single nucleotide polymorphisms associated with beta-lactam resistance within pneumo-  
403 cocal mosaic genes. *PLoS Genet*, 10(8), 2014.
- 404 Ofir Cohen, Haim Ashkenazy, David Burstein, and Tal Pupko. Uncovering the co-evolutionary network  
405 among prokaryotic genes. *Bioinformatics*, 28(18):i389–i394, 2012.
- 406 Ofir Cohen, Haim Ashkenazy, Eli Levy Karin, David Burstein, and Tal Pupko. Copap: coevolution of  
407 presence–absence patterns. *Nucleic Acids Res*, 41(W1):W232–W237, 2013.
- 408 Caitlin Collins and Xavier Didelot. A phylogenetic method to perform genome-wide association studies in  
409 microbes that accounts for population structure and recombination. *PLoS Comput Biol*, 14(2):e1005958,  
410 2018.
- 411 Sarah G Earle, Chieh-Hsi Wu, Jane Charlesworth, Nicole Stoesser, N Claire Gordon, Timothy M Walker,  
412 Chris CA Spencer, Zamin Iqbal, David A Clifton, Katie L Hopkins, et al. Identifying lineage effects when  
413 controlling for population structure improves power in bacterial association studies. *Nat Microbiol*, 1(5):  
414 1–8, 2016.
- 415 Maha R Farhat, B Jesse Shapiro, Karen J Kieser, Razvan Sultana, Karen R Jacobson, Thomas C Victor,  
416 Robin M Warren, Elizabeth M Streicher, Alistair Calver, Alex Sloutsky, et al. Genomic analysis identifies  
417 targets of convergent positive selection in drug-resistant mycobacterium tuberculosis. *Nat Genet*, 45(10):  
418 1183, 2013.
- 419 Susanne A Fritz and Andy Purvis. Selectivity in mammalian extinction risk and threat types: a new measure  
420 of phylogenetic signal strength in binary traits. *Conservation Biol*, 24(4):1042–1051, 2010.
- 421 Barry G Hall. SNP-associations and phenotype predictions from hundreds of microbial genomes without  
422 genome alignments. *PloS One*, 9(2), 2014.
- 423 Rebecca J Hall, Fiona J Whelan, Elizabeth A Cummins, Christopher Connor, Alan McNally, and James O  
424 McInerney. Gene-gene relationships in an *Escherichia coli* accessory genome are linked to function and  
425 mobility. *Microb Genomics*, 7(9), 2021.
- 426 Martin Hunt, Alison E Mather, Leonor Sánchez-Busó, Andrew J Page, Julian Parkhill, Jacqueline A Keane,  
427 and Simon R Harris. ARIBA: rapid antimicrobial resistance genotyping directly from sequencing reads.  
428 *Microb Genomics*, 3(10), 2017.
- 429 Robert J Klein, Caroline Zeiss, Emily Y Chew, Jen-Yue Tsai, Richard S Sackler, Chad Haynes, Alice K  
430 Henning, John Paul SanGiovanni, Shrikant M Mane, Susan T Mayne, et al. Complement factor H poly-  
431 morphism in age-related macular degeneration. *Science*, 308(5720):385–389, 2005.
- 432 Maisem Laabei, Mario Recker, Justine K Rudkin, Mona Aldeljawi, Zeynep Gulay, Tim J Sloan, Paul  
433 Williams, Jennifer L Endres, Kenneth W Bayles, Paul D Fey, et al. Predicting the virulence of MRSA  
434 from its genome sequence. *Genome Res*, 24(5):839–849, 2014.
- 435 Florent Lassalle, Philippe Veber, Elita Jauneikaite, and Xavier Didelot. Automated reconstruction of all gene  
436 histories in large bacterial pangenome datasets and search for co-evolved gene modules with Pantagruel.  
437 *BioRxiv*, page 586495, 2019.
- 438 John A Lees, Minna Vehkala, Niko Välimäki, Simon R Harris, Claire Chewapreecha, Nicholas J Croucher,  
439 Pekka Marttinen, Mark R Davies, Andrew C Steer, Steven YC Tong, et al. Sequence element enrichment  
440 analysis to determine the genetic basis of bacterial phenotypes. *Nat Commun*, 7(1):1–8, 2016.

- 441 John A Lees, Marco Galardini, Stephen D Bentley, Jeffrey N Weiser, and Jukka Corander. pyseer: a  
442 comprehensive tool for microbial pangenome-wide association studies. *Bioinformatics*, 34(24):4310–4312,  
443 2018.
- 444 Chaoyue Liu, Benjamin Wright, Emma Allen-Vercoe, Hong Gu, and Robert Beiko. Phylogenetic clustering  
445 of genes reveals shared evolutionary trajectories and putative gene functions. *Genome Biol Evol*, 10(9):  
446 2255–2265, 2018.
- 447 Trudy FC Mackay. Epistasis and quantitative traits: using model organisms to study gene–gene interactions.  
448 *Nat Rev Genet*, 15(1):22–33, 2014.
- 449 Wayne P Maddison. Testing character correlation using pairwise comparisons on a phylogeny. *J Theor Biol*,  
450 202(3):195–204, 2000.
- 451 Alex J McCarthy and Jodi A Lindsay. The distribution of plasmids that carry virulence and resistance genes  
452 in *Staphylococcus aureus* is lineage associated. *BMC Microbiol*, 12(1):1–8, 2012.
- 453 Mark Pagel. Detecting correlated evolution on phylogenies: a general method for the comparative analysis  
454 of discrete characters. *Proc Roy Soc London B: Biol Sci*, 255(1342):37–45, 1994.
- 455 Robert A Petit III and Timothy D Read. *Staphylococcus aureus* viewed from the perspective of 40,000+  
456 genomes. *PeerJ*, 6:e5261, 2018.
- 457 Patrick C Phillips. Epistasis—the essential role of gene interactions in the structure and evolution of genetic  
458 systems. *Nat Rev Genet*, 9(11):855–867, 2008.
- 459 Robert A Power, Siva Davaniah, Anne Derache, Eduan Wilkinson, Frank Tanser, Ravindra K Gupta, Deenan  
460 Pillay, and Tulio De Oliveira. Genome-wide association study of HIV whole genome sequences validated  
461 using drug resistance. *PLoS One*, 11(9), 2016.
- 462 Robert A Power, Julian Parkhill, and Tulio de Oliveira. Microbial genome-wide association studies: lessons  
463 from human GWAS. *Nat Rev Genet*, 18(1):41, 2017.
- 464 Jonathan K Pritchard and Peter Donnelly. Case–control studies of association in structured or admixed  
465 populations. *Theor Popul Biol*, 60(3):227–237, 2001.
- 466 Shaun Purcell, Benjamin Neale, Kathe Todd-Brown, Lori Thomas, Manuel AR Ferreira, David Bender,  
467 Julian Maller, Pamela Sklar, Paul IW De Bakker, Mark J Daly, et al. PLINK: a tool set for whole-genome  
468 association and population-based linkage analyses. *Am J Hum Genet*, 81(3):559–575, 2007.
- 469 Timothy D Read and Ruth C Massey. Characterizing the genetic basis of bacterial phenotypes using genome-  
470 wide association studies: a new direction for bacteriology. *Genome Med*, 6(11):109, 2014.
- 471 Morteza M Saber and B Jesse Shapiro. Benchmarking bacterial genome-wide association study methods  
472 using simulated genomes and phenotypes. *Microb Genomics*, 6(3), 2020.
- 473 Katie Saund and Evan S Snitkin. Hogwash: three methods for genome-wide association studies in bacteria.  
474 *Microb Genomics*, 6(11), 2020.
- 475 Samuel K Sheppard, Xavier Didelot, Guillaume Meric, Alicia Torralbo, Keith A Jolley, David J Kelly,  
476 Stephen D Bentley, Martin CJ Maiden, Julian Parkhill, and Daniel Falush. Genome-wide association  
477 study identifies vitamin B5 biosynthesis as a host specificity factor in *Campylobacter*. *Proc Natl Acad Sci*  
478 *USA*, 110(29):11923–11927, 2013.
- 479 Danielle Welter, Jacqueline MacArthur, Joannella Morales, Tony Burdett, Peggy Hall, Heather Junkins,  
480 Alan Klemm, Paul Flicek, Teri Manolio, Lucia Hindorff, et al. The NHGRI GWAS Catalog, a curated  
481 resource of SNP-trait associations. *Nucleic Acids Res*, 42(D1):D1001–D1006, 2014.



482 Nicole E Wheeler, Sandra Reuter, Claire Chewapreecha, John A Lees, Beth Blane, Carlyne Horner, David  
483 Enoch, Nicholas Brown, M Estée Török, David M Aanensen, et al. Contrasting approaches to genome-wide  
484 association studies impact the detection of resistance mechanisms in *Staphylococcus aureus*. *BioRxiv*, page  
485 758144, 2019.

486 Fiona Jane Whelan, Martin Rusilowicz, and James Oscar McInerney. Coinfinder: detecting significant  
487 associations and dissociations in pangenomes. *Microb Genomics*, 6(3), 2020.

## 488 A Sample sizes for each clonal complex.

489 Figure S1 displays the sample sizes for each clonal complex in this dataset, both prior to and after removal  
490 of samples that were identical across both the core genome and in accessory gene presence/absence.

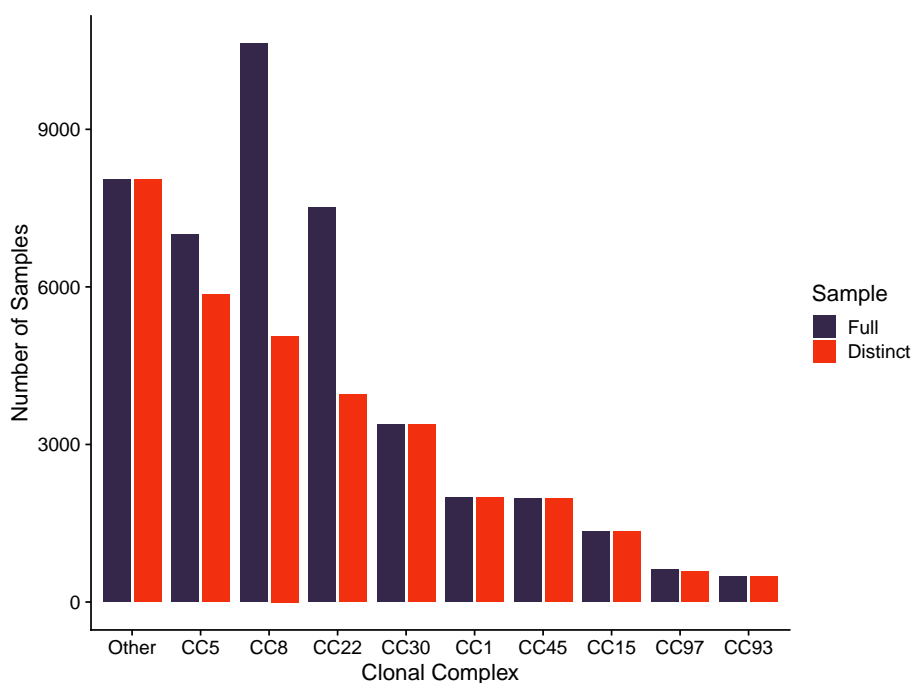

Figure S1: The total number of public samples per clonal complex in Staphopia (“Full”), as well as the total number of samples obtained after removing samples that were identical across both the core genome and accessory gene presence/absence (“Distinct”).

## 491 B Distance scales and number of close pairs for each clonal complex

493 For our data, the individual clonal complexes varied as to the scale of divergence they comprised. Table S1  
494 displays the distance cutoffs and number of close pairs used in our analyses of individual clonal complexes.

495 Figure S2 displays the pairwise distance distributions for all distinct samples in each clonal complex,  
496 along with the distances cutoffs from Table S1.

## 497 C Statistical test for significance

498 Because the coevolution score only records events that affirmatively contribute, it is possible for pairs of genes  
499 that individually vary frequently across the set of samples to accumulate a substantial score by chance. To test

| Clonal Complex | Distance Cutoff       | No. Close Pairs |
|----------------|-----------------------|-----------------|
| CC97           | $4.98 \times 10^{-5}$ | 5125            |
| CC93           | $3.84 \times 10^{-5}$ | 4847            |
| CC15           | $2.13 \times 10^{-5}$ | 4368            |
| CC1            | $9.96 \times 10^{-6}$ | 4211            |
| CC45           | $8.54 \times 10^{-6}$ | 4177            |
| CC30           | $1.42 \times 10^{-6}$ | 3566            |
| CC5            | 0                     | 4397            |
| CC8            | 0                     | 5000            |
| CC22           | 0                     | 5000            |

Table S1: Core genome distance cutoffs and number of close pairs for each clonal complex. For CC8 and CC22, the close pairs were downsampled to reach the target number of 5000 due to the fact that there were more than 5000 pairs of samples that were identical in the core genome. Distances are fraction of divergent bases in the core genome.

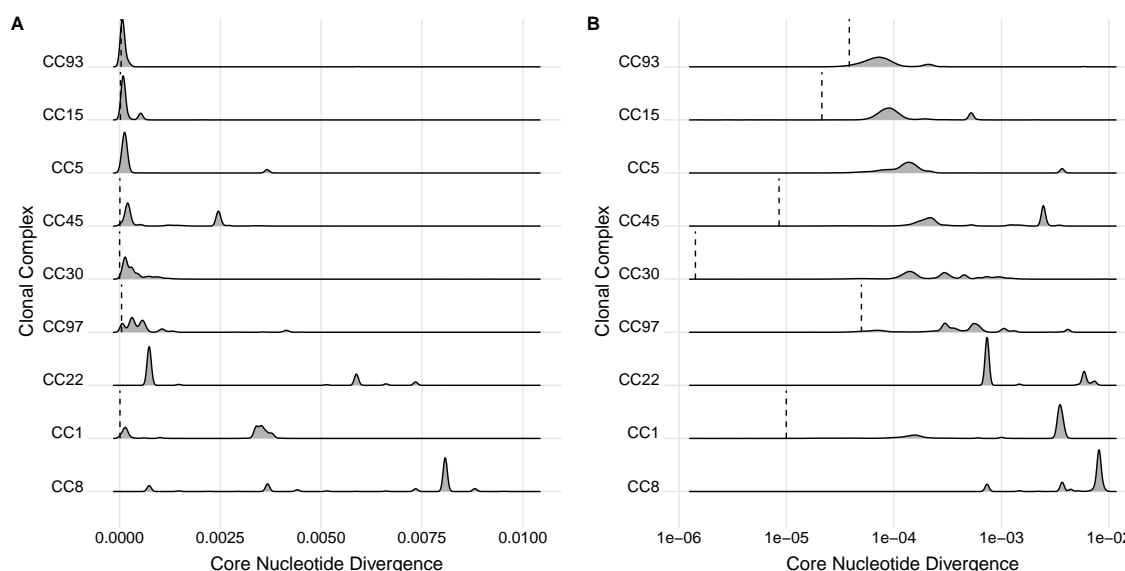

Figure S2: Pairwise nucleotide divergence in the core genome of *Staphoplia* samples, where all zero values were excluded. (A) Linear divergence scale. (B) Log divergence scale. Distance cutoffs used to find close pairs are given by vertical dashed lines.

500 for this, for each gene in each clonal complex, we first compute the number of presence/absence discordances  
 501 that gene has across all close pairs. Then, for each pair of genes, we use Fisher's Exact Test to see if the  
 502 number of joint discordances (i.e. if both genes are discordant for the same close pair) is significantly greater  
 503 than would be expected by chance. We use the most conservative multiple testing correction (the Bonferroni  
 504 correction) with  $\alpha = 0.05$  to obtain significant interactions.

## 505 D Score vs. correlation for all clonal complexes

506 Figure S3 displays coevolution score vs. correlation for each clonal complex. The patterns seen in Figure 3  
 507 are consistent across the clonal complexes.

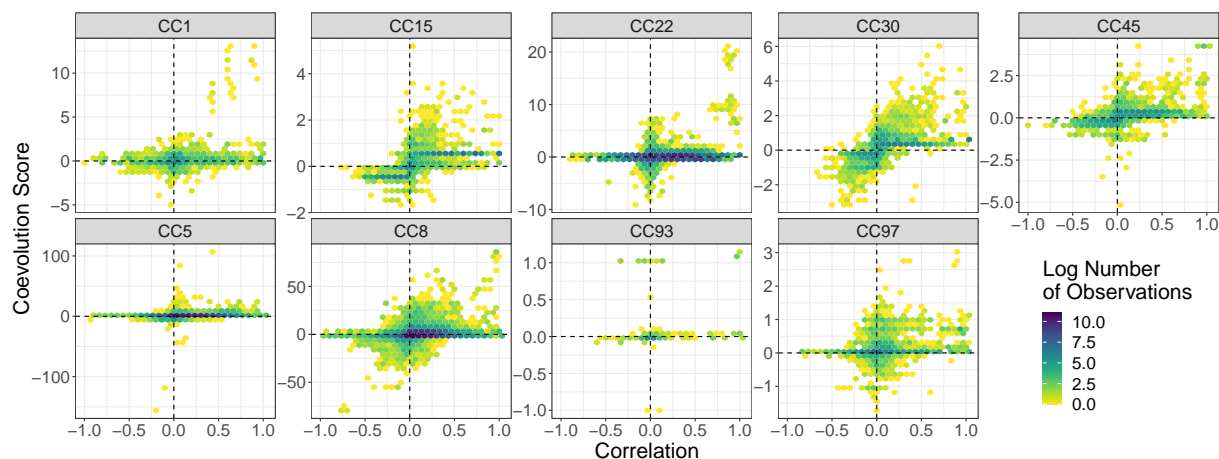

Figure S3: Coevolution score vs. correlation for each clonal complex. The sign of the score indicates its polarity. The color of a hexagonal bin represents the log of the number of data points in that bin. The coevolution score highlights only a small fraction of the highly correlated pairs of genes, as well as some pairs that do not have a high overall correlation.

## E Positive Bias when close pairs are not all disjoint

If close pairs share samples between them, they are no longer independent. This effect is particularly strong in bushes, where each sample is in  $n$  close pairs, where  $n$  is the size of the bush. This dependence may affect the balance of positive and negative polarities among the scores. To properly estimate whether or not genetic interactions are biased towards positive association, we must correct for potential positive bias due to this dependence. We correct for this bias by (for the purposes of this portion of the analysis only) re-computing the coevolution score using only disjoint sets of close pairs, so that no close pair shares a sample with another close pair.

To create sets of independent close pairs for the purposes of detecting the prevalence of positive interactions, we randomly chose one representative close pair for each bush, computed the scores across those selected disjoint sets of close pairs, and repeated that process 100 times. We then noted for each gene pair if its positive score was bigger than its negative score more often across these 100 replicates. If so, that interaction was labeled “positive”. We fit a Bernoulli distribution to the distribution of these positive labels. The probability parameter of this distribution represents the probability that a particular interaction is positive.

## F Example phylogenetic tree for CC97

Figure S4 displays the phylogenetic tree for CC1, the clonal complex with the largest sample size in Staphopia. The bushy structure is clearly seen, with the vast majority of samples belonging to a handful of very-recently-diverged bushes.

## G Gene annotation

We used the gene names provided by Staphopia for gene annotation. However, due to the fact that Staphopia is a collection of publicly-available datasets with no consistent curation, it is possible that a particular gene does not have its name category filled out.

For each gene name in Staphopia, we found the corresponding gene product annotations. The gene product is the highest level of annotation for a gene in Staphopia that includes some information about the gene itself (other possible annotations are NCBI locus tag and product ID, both of which are narrower). We then found all instances of the gene product in Staphopia, and tabulated the number of those instances that were unnamed. If there exist unnamed instances of the same gene, and the gene product is known, then

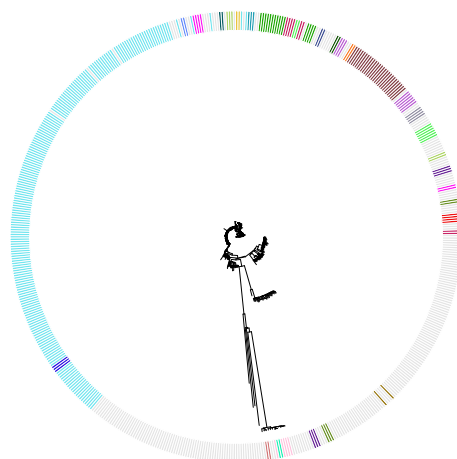

Figure S4: The phylogenetic tree of CC97 consists of bushes of very closely-related samples separated by long branches. This bushy structure makes the specific relationships between samples within a bush subject to resolution error. Colors distinguish separate bushes for close pairs at distance cutoff  $5 \times 10^{-5}$ . Samples not included in a close pair are not colored.

535 these instances would appear in this set. Table S2 lists all the genes that have *any* other instance of their  
 536 gene product that occurs without a name. There are 144 such genes.

537 For each gene product in Table S2, we observed the distribution of lengths of all genes corresponding to  
 538 that product, separated by name. If the distribution of gene lengths with no name clearly matched that of  
 539 a named gene, we renamed the genes with no name after that name. The genes affected by this were: *add*,  
 540 *ahs2*, *AHS2*, *alr*, *apbC*, *arcB*, *aspC*, *blaR1*, *chrR*, *coa*, *hadL*, *hmrA*, *hyuA*, *lytA*, *map*, *metN*, *polA*, *prfC*,  
 541 *radC*, *sdrD*, *sdrE*, *sph*, *strH*, *ugl*, *yidD*, *ykuR*, and *yoaB*. This adjustment is likely to turn absences into  
 542 presences, which means genes that may have had substantial positive and negative relationships may find  
 543 the negative relationships spurious due to lack of annotation.

544 In addition, if the length distribution of a gene product subsumed that for a named gene, we added that  
 545 gene product to our list of “genes” in order to make sure we do not miss a gene due to poor annotation. The  
 546 genes affected by these were: *atsA*, *chuR*, *dctP*, *dld*, *hysA*, *int*, *nhaC*, *paaK*, *relA*, *sotB*, *tadA*, *tagE*, *tetR*,  
 547 *traA*, and *ybgI*. These adjustments do not affect results for the named genes, but introduce additional tests  
 548 of association with the corresponding gene products.

Table S2: All named genes whose products also corresponded to unnamed genes in Staphopia. Note that the “%2C”s are present in the database text.

| Gene | Product                                                         | Total  | Unnamed |
|------|-----------------------------------------------------------------|--------|---------|
| abcA | ABC superfamily ATP binding cassette transporter%2C ABC protein | 857136 | 641621  |
| add  | Adenosine deaminase                                             | 1033   | 3       |
| aes  | Alpha/beta hydrolase fold-3 domain-containing protein           | 128698 | 42846   |
| ahs2 | allophanate hydrolase subunit 2                                 | 85882  | 42904   |
| AHS2 | allophanate hydrolase subunit 2                                 | 85882  | 42904   |
| aldH | putative aldehyde dehydrogenase                                 | 85931  | 43004   |
| alr  | Alanine racemase                                                | 3      | 1       |
| ami  | N-acetylmuramoyl-L-alanine amidase                              | 119954 | 85755   |
| ansA | Alpha/beta hydrolase fold-3 domain-containing protein           | 128698 | 42846   |

Table S2: All named genes whose products also corresponded to unnamed genes in Staphopia. Note that the “%2C”s are present in the database text.

| Gene  | Product                                                                          | Total  | Unnamed |
|-------|----------------------------------------------------------------------------------|--------|---------|
| apbC  | Iron-sulfur cluster carrier protein                                              | 3      | 2       |
| appD  | oligopeptide ABC transporter ATP-binding protein                                 | 9603   | 4605    |
| arcB  | Delta(1)-pyrroline-2-carboxylate reductase                                       | 3      | 1       |
| aspC  | Aspartate aminotransferase                                                       | 41     | 3       |
| atsA  | Arylsulfatase                                                                    | 50     | 49      |
| bglG  | BglG family transcriptional antiterminator                                       | 44432  | 43442   |
| blaR1 | beta-lactamase regulatory protein                                                | 38829  | 26408   |
| bsmA  | Glycine/sarcosine N-methyltransferase                                            | 626    | 625     |
| butA  | putative short chain dehydrogenase                                               | 86973  | 44009   |
| chrR  | Chromate reductase                                                               | 104    | 11      |
| chuR  | Anaerobic sulfatase-maturing enzyme                                              | 10     | 8       |
| clpP  | ATP-dependent Clp protease proteolytic subunit                                   | 73025  | 29964   |
| coa   | staphylocoagulase                                                                | 35495  | 10470   |
| comC  | Type 4 prepilin-like proteins leader peptide-processing enzyme                   | 42580  | 42577   |
| cycA  | D-serine/D-alanine/glycine transporter                                           | 17083  | 17082   |
| cztB  | cation diffusion facilitator family transporter                                  | 86086  | 42959   |
| dctP  | Solute-binding protein                                                           | 110    | 72      |
| dld   | D-lactate dehydrogenase                                                          | 42906  | 42899   |
| efb   | fibrinogen-binding protein                                                       | 78059  | 35499   |
| fccA  | Fumarate reductase flavoprotein subunit                                          | 21     | 2       |
| fhuB  | iron (Fe3+) ABC superfamily ATP binding cassette transporter%2C membrane protein | 182954 | 42935   |
| frdA  | Fumarate reductase flavoprotein subunit                                          | 21     | 2       |
| gcvH  | glycine cleavage system H protein                                                | 85666  | 42761   |
| gerCC | iron (Fe3+) ABC superfamily ATP binding cassette transporter%2C membrane protein | 182954 | 42935   |
| glcT  | transcriptional antiterminator                                                   | 89456  | 46399   |
| glgA  | Glycogen synthase                                                                | 74     | 56      |
| glnR  | MerR family transcriptional regulator                                            | 175151 | 132241  |
| glpQ  | glycerophosphoryl diester phosphodiesterase                                      | 85818  | 42940   |
| glxK  | glycerate kinase                                                                 | 85911  | 42896   |
| graR  | winged helix family two component transcriptional regulator                      | 267914 | 47894   |
| gtfA  | Sucrose phosphorylase                                                            | 4      | 2       |
| hadL  | (S)-2-haloacid dehalogenase                                                      | 46     | 42      |
| hisC  | histidinol-phosphate aminotransferase                                            | 86012  | 42888   |
| hmrA  | peptidase%2C M20/M25/M40 family                                                  | 86273  | 43131   |
| hsdR  | type-I restriction-modification system restriction endonuclease subunit          | 44955  | 1690    |
| hssR  | winged helix family two component transcriptional regulator                      | 267914 | 47894   |
| hssS  | integral membrane sensor signal transduction histidine kinase                    | 220005 | 48252   |
| htsC  | iron (Fe3+) ABC superfamily ATP binding cassette transporter%2C membrane protein | 182954 | 42935   |
| hysA  | hyaluronate lyase 2                                                              | 55143  | 11133   |
| hyuA  | D-hydantoinase                                                                   | 7      | 2       |
| ifcA  | Fumarate reductase flavoprotein subunit                                          | 21     | 2       |
| int   | pathogenicity island protein%2C integrase                                        | 72059  | 62243   |
| kdpE  | winged helix family two component transcriptional regulator                      | 267914 | 47894   |
| ldhA  | D-lactate dehydrogenase                                                          | 42906  | 42899   |
| lpd   | Dihydrolipoyl dehydrogenase                                                      | 18     | 13      |
| lpdG  | Dihydrolipoyl dehydrogenase                                                      | 18     | 13      |
| lpl1  | staphylococcal tandem lipoprotein                                                | 363146 | 136451  |
| lpl2  | staphylococcal tandem lipoprotein                                                | 363146 | 136451  |
| lpl3  | staphylococcal tandem lipoprotein                                                | 363146 | 136451  |

Table S2: All named genes whose products also corresponded to unnamed genes in Staphopia. Note that the “%2C”s are present in the database text.

| Gene   | Product                                                                           | Total  | Unnamed |
|--------|-----------------------------------------------------------------------------------|--------|---------|
| lplA1  | lipoyltransferase and lipoate-protein ligase                                      | 85755  | 42945   |
| lplA2  | lipoate-protein ligase A family protein                                           | 85770  | 42843   |
| lysP   | APC family amino acid-polyamine-organocation transporter                          | 300245 | 257410  |
| lytA   | Autolysin                                                                         | 22     | 3       |
| map    | major histocompatibility complex class II analog protein%2C Map                   | 42741  | 9248    |
| metB   | bifunctional cystathionine gamma-lyase/gamma-synthase                             | 129631 | 86040   |
| metN   | DL-methionine transporter ATP-binding subunit                                     | 86036  | 42939   |
| mntA   | ABC superfamily ATP binding cassette transporter%2C ABC protein                   | 857136 | 641621  |
| mntB   | ABC superfamily ATP binding cassette transporter%2C membrane protein              | 512538 | 298021  |
| mntC   | ABC superfamily ATP binding cassette transporter%2C binding protein               | 302216 | 259195  |
| mreB   | ABC superfamily ATP binding cassette transporter%2C membrane protein              | 512538 | 298021  |
| msrR   | cell envelope transcriptional attenuator                                          | 129179 | 86248   |
| nhaC   | putative Na <sup>+</sup> /H <sup>+</sup> antiporter                               | 43441  | 642     |
| nrdG   | anaerobic ribonucleoside-triphosphate reductase activating protein                | 85471  | 42678   |
| nuc    | thermonuclease precursor family protein                                           | 45215  | 3403    |
| nudC   | NADH pyrophosphatase                                                              | 42926  | 42896   |
| opp-1B | oligopeptide ABC superfamily ATP binding cassette transporter%2C membrane protein | 342901 | 81193   |
| opp-1C | oligopeptide ABC superfamily ATP binding cassette transporter%2C membrane protein | 342901 | 81193   |
| opp-1D | oligopeptide ABC superfamily ATP binding cassette transporter%2C ABC protein      | 191127 | 77985   |
| opp-1F | ABC superfamily ATP binding cassette transporter%2C ABC protein                   | 857136 | 641621  |
| opp-2B | oligopeptide ABC superfamily ATP binding cassette transporter%2C membrane protein | 342901 | 81193   |
| opp-2C | oligopeptide ABC superfamily ATP binding cassette transporter%2C membrane protein | 342901 | 81193   |
| oppB   | oligopeptide ABC superfamily ATP binding cassette transporter%2C membrane protein | 342901 | 81193   |
| oppC   | oligopeptide ABC superfamily ATP binding cassette transporter%2C membrane protein | 342901 | 81193   |
| oppD   | oligopeptide ABC superfamily ATP binding cassette transporter%2C ABC protein      | 191127 | 77985   |
| oppF   | oligopeptide ABC superfamily ATP binding cassette transporter%2C ABC protein      | 191127 | 77985   |
| paaK   | Phenylacetate-coenzyme A ligase                                                   | 5      | 4       |
| pacL   | Calcium-transporting ATPase                                                       | 9      | 5       |
| pbp2   | glycosyl transferase family protein                                               | 218553 | 132538  |
| pemK   | PemK-like growth inhibitor protein                                                | 2395   | 484     |
| polA   | DNA-directed DNA polymerase I                                                     | 42990  | 6760    |
| potB   | binding-protein-dependent transport system inner membrane protein                 | 214672 | 128793  |
| potC   | binding-protein-dependent transport system inner membrane protein                 | 214672 | 128793  |
| prfC   | peptide chain release factor 3                                                    | 42967  | 13177   |
| radC   | DNA repair protein RadC                                                           | 32602  | 3       |
| recQ   | ATP-dependent DNA helicase                                                        | 86539  | 43013   |
| relA   | GTP pyrophosphokinase                                                             | 85947  | 85945   |
| rimL   | GNAT family acetyltransferase                                                     | 365821 | 322862  |
| saeR   | winged helix family two component transcriptional regulator                       | 267914 | 47894   |
| saeS   | integral membrane sensor signal transduction histidine kinase                     | 220005 | 48252   |
| sarA   | staphylococcal accessory regulator family protein                                 | 86280  | 647     |
| sarV   | staphylococcal accessory regulator family protein                                 | 86280  | 647     |
| sbnD   | MFS family major facilitator transporter                                          | 195311 | 152543  |
| sdrD   | Ser-Asp rich fibrinogen/bone sialoprotein-binding protein SdrD                    | 33598  | 18226   |
| sdrE   | Ser-Asp rich fibrinogen/bone sialoprotein-binding protein SdrE                    | 52391  | 37588   |
| set12  | superantigen-like protein                                                         | 409945 | 236718  |
| set15  | superantigen-like protein                                                         | 409945 | 236718  |
| set6   | superantigen-like protein                                                         | 409945 | 236718  |
| set7   | superantigen-like protein                                                         | 409945 | 236718  |

Table S2: All named genes whose products also corresponded to unnamed genes in Staphopia. Note that the “%2C”s are present in the database text.

| Gene | Product                                                                            | Total  | Unnamed |
|------|------------------------------------------------------------------------------------|--------|---------|
| set8 | superantigen-like protein                                                          | 409945 | 236718  |
| sirA | iron (Fe3+) ABC superfamily ATP binding cassette transporter%2C binding protein    | 85726  | 43011   |
| sirB | iron (Fe3+) ABC superfamily ATP binding cassette transporter%2C membrane protein   | 182954 | 42935   |
| sotB | sugar efflux transporter                                                           | 40197  | 40192   |
| sph  | Oleate hydratase                                                                   | 3      | 1       |
| sqr  | Sulfide-quinone reductase                                                          | 11     | 5       |
| srrA | winged helix family two component transcriptional regulator                        | 267914 | 47894   |
| srrB | integral membrane sensor signal transduction histidine kinase                      | 220005 | 48252   |
| ssb  | ssDNA-binding protein                                                              | 65729  | 16557   |
| ssb  | Single-stranded DNA-binding protein                                                | 76     | 69      |
| sspB | glycoside hydrolase family protein                                                 | 116907 | 74125   |
| stbD | addiction module antitoxin%2C Axe family                                           | 71619  | 37920   |
| strH | Beta-N-acetylhexosaminidase                                                        | 57     | 40      |
| sufB | ABC superfamily ATP binding cassette transporter%2C membrane protein               | 512538 | 298021  |
| sufC | ABC superfamily ATP binding cassette transporter%2C ABC protein                    | 857136 | 641621  |
| sufD | ABC superfamily ATP binding cassette transporter%2C membrane protein               | 512538 | 298021  |
| tadA | tRNA-specific adenosine deaminase                                                  | 42952  | 42951   |
| tagE | Poly(glycerol-phosphate) alpha-glucosyltransferase                                 | 42959  | 42958   |
| tagG | teichoic acid ABC superfamily ATP binding cassette transporter%2C membrane protein | 85904  | 42835   |
| tetR | TetR family transcriptional regulator                                              | 150900 | 95994   |
| traA | Pilin                                                                              | 4      | 3       |
| trxA | thioredoxin                                                                        | 174163 | 128683  |
| ugl  | Unsaturated chondroitin disaccharide hydrolase                                     | 93     | 8       |
| ushA | 5'-nucleotidase                                                                    | 42977  | 4       |
| uvrC | glycosyl transferase family protein                                                | 218553 | 132538  |
| vraS | integral membrane sensor signal transduction histidine kinase                      | 220005 | 48252   |
| yacO | TrmH family RNA methyltransferase                                                  | 86100  | 43140   |
| ybgI | GTP cyclohydrolase 1 type 2                                                        | 7      | 6       |
| yfbB | acyl-CoA thioester hydrolase                                                       | 86121  | 42955   |
| yggX | putative Fe(2+)-trafficking protein                                                | 2      | 1       |
| yidD | Putative membrane protein insertion efficiency factor                              | 42893  | 42532   |
| ykoC | ABC superfamily ATP binding cassette transporter%2C membrane protein               | 512538 | 298021  |
| ykoD | ABC superfamily ATP binding cassette transporter%2C ABC protein                    | 857136 | 641621  |
| ykuR | N-acetyldiaminopimelate deacetylase                                                | 9      | 5       |
| yloB | Calcium-transporting ATPase                                                        | 9      | 5       |
| yoaB | Calcium-transporting ATPase 1                                                      | 14     | 11      |
| yqfL | Putative pyruvate%2C phosphate dikinase regulatory protein                         | 43157  | 3       |

## 549 H Coevolution score does not systematically depend on the choice 550 of distance cutoff

551 To study how the choice of distance cutoff affected the coevolution score, we computed the coevolution score  
552 for each clonal complex for each gene pair across a range of distance cutoffs, chosen such that for each clonal  
553 complex separately, the number of close pairs used ranged from 1000 to 10,000 in intervals of 1000. We chose  
554 the distance cutoff that results from using 5000 close pairs for Table S1.

555 Figure S5 displays the scores as a function of distance cutoff for clonal complex CC15. The scores for

556 individual gene interactions are connected by lines. While specific rank order may change, in general, the  
557 large scores remain large and the small scores remain small across the range of distance cutoffs. The distance  
558 cutoff we have chosen may be conservative by this analysis.

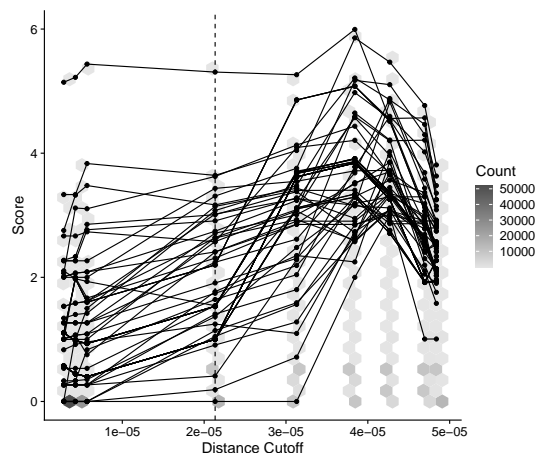

Figure S5: The choice of the distance cutoff does not systematically affect the coevolution score, and the highest scores remain high across a wide range of cutoffs. For gene pairs whose maximum score across these cutoffs is at least 3, points that correspond to the same gene pair are connected by lines. All other gene pairs are represented in the hexagonal heatmap. The dashed line depicts the cutoff for 5000 close pairs used. These gene pairs are from clonal complex CC15.

## 559 I Full-dataset analysis

560 Because scales of divergence vary dramatically between clonal complexes (Figure S2), simply choosing a  
561 single distance cutoff using all nonredundant samples from the dataset will bias the set of chosen samples  
562 towards dramatic overrepresentation of some clonal complexes but not others. Choosing a larger distance  
563 cutoff leads to a more representative sample (Figure S6).

564 On the other hand, choosing a larger distance threshold results in an enormous number of close pairs  
565 that render the procedure to compute coevolution scores computationally intensive. To combat this problem,  
566 we chose a compromise distance threshold of 0.0005 (vertical line in Figure S6). In choosing this distance  
567 threshold, we did not consider CC5, CC8, or CC22; these clonal complexes had many samples that were  
568 identical in the core sequence. For the other clonal complexes, we found that there were approximately 18  
569 million close pairs at this distance cutoff, resulting in approximately 1.8 million per clonal complex. For  
570 CC5, CC8, and CC22, we randomly sampled 1.8 million close pairs each from the set of close pairs that were  
571 below the distance cutoff, resulting in a total of approximately 23.4 million close pairs. From this total set  
572 of close pairs, we randomly sampled 40,000 to serve as our set of close pairs for the full dataset analysis.



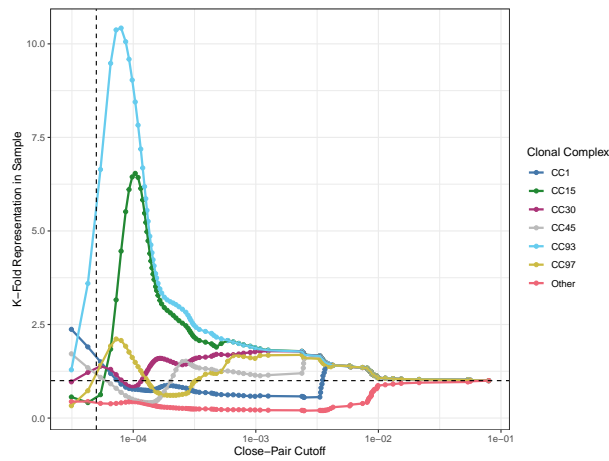

Figure S6: Choosing a core-genome distance cutoff across the whole *Staphopia* dataset overrepresents some clonal complexes and underrepresents others. The y-axis represents the ratio of the fraction of samples in each clonal complex below the corresponding distance cutoff to the fraction of samples in each clonal complex in the whole dataset. Excluded from this set of clonal complexes are CC5, CC8, and CC22, which have substantial numbers of samples that are identical in the core genome. The vertical line represents the distance cutoff chosen for the full dataset analysis.
